# Supplementary material
Source: PubMed Central journal article supplement (PMC7333996)
Supplement: mmc1.pdf [file mmc1.pdf]

# THE LANCET

## Haematology

### Supplementary appendix

This appendix formed part of the original submission and has been peer reviewed. We post it as supplied by the authors.

Supplement to: Stanworth SJ, New HV, Apelseth TO, et al. Effects of the COVID-19 pandemic on supply and use of blood for transfusion. *Lancet Haematol* 2020; published online July 3. [https://doi.org/10.1016/S2352-3026\(20\)30186-1](https://doi.org/10.1016/S2352-3026(20)30186-1).

## APPENDICES

**Table 1 Search strategies**

|                                                                                                                                                                                                                                                                                                                                                                                                                                                                                                                                                                                                                                                                                                                                                                                                                                                                                                                                                                                                                                                                                                                                                                                                                                                                                                                                                                                                                                                                                                                                                                                                                                                                                                                                                                                                 |
|-------------------------------------------------------------------------------------------------------------------------------------------------------------------------------------------------------------------------------------------------------------------------------------------------------------------------------------------------------------------------------------------------------------------------------------------------------------------------------------------------------------------------------------------------------------------------------------------------------------------------------------------------------------------------------------------------------------------------------------------------------------------------------------------------------------------------------------------------------------------------------------------------------------------------------------------------------------------------------------------------------------------------------------------------------------------------------------------------------------------------------------------------------------------------------------------------------------------------------------------------------------------------------------------------------------------------------------------------------------------------------------------------------------------------------------------------------------------------------------------------------------------------------------------------------------------------------------------------------------------------------------------------------------------------------------------------------------------------------------------------------------------------------------------------|
| <p><b>1a: The focus of all searching is references in which COVID-19, or an associated term is mentioned [title, abstract or as a keyword]. The PubMed search string is below:</b></p>                                                                                                                                                                                                                                                                                                                                                                                                                                                                                                                                                                                                                                                                                                                                                                                                                                                                                                                                                                                                                                                                                                                                                                                                                                                                                                                                                                                                                                                                                                                                                                                                          |
| <p>(coronavirus*[TW] OR coronovirus*[TW] OR coronavirinae*[TW] OR Wuhan*[TW] OR Hubei*[TW] OR Huanan[TW] OR "2019-CoV" OR "2019-nCoV" OR 2019nCoV OR nCoV2019 OR nCoV-2019 OR COVID19 OR "COVID-19" OR "CORVID-19" OR CORVID19 OR "WN-CoV"[TW] OR WNCov[TW] OR HCoV-19 OR HCoV19 OR CoV[TW] OR "2019 novel"[TW] OR SARSCov19 OR SARS-CoV-2 OR SARSCoV-2 OR SARSCoV2 OR SARS-CoV2 OR SARSCov19 OR SARS-Cov19 OR "SARSCov-19" OR "SARS-Cov-19" OR nCorona*[TW] OR nCorono*[TW] OR "novel corona virus"[TW] OR "new corona virus"[TW] OR COVID*[TW] OR "corona virus disease 2019"[TW] OR "2019-ncov disease"[TW] OR "2019-ncov infection"[TW] OR "2019-ncov infections"[TW] OR "2019-nCoV"[TW] OR "wn cov"[TW] OR "2019 novel"[TW] OR nCov*[TW] OR n-cov*[TW])</p>                                                                                                                                                                                                                                                                                                                                                                                                                                                                                                                                                                                                                                                                                                                                                                                                                                                                                                                                                                                                                                |
| <p><b>1b: The searching string for references relevant to emergency planning for blood shortages is shown below:</b></p>                                                                                                                                                                                                                                                                                                                                                                                                                                                                                                                                                                                                                                                                                                                                                                                                                                                                                                                                                                                                                                                                                                                                                                                                                                                                                                                                                                                                                                                                                                                                                                                                                                                                        |
| <p><b>MEDLINE</b></p> <ol style="list-style-type: none"> <li>1. Blood Banks/</li> <li>2. Blood Donors/</li> <li>3. 1 or 2</li> <li>4. exp Disasters/</li> <li>5. "Health Services Needs and Demand"/ or Needs Assessment/</li> <li>6. 4 or 5</li> <li>7. 3 and 6</li> <li>8. (((blood or platelets or plasma or FFP or red cells or red blood cells or transfusion or blood donor* or blood donat* or platelet donor* or platelet donat* or blood bank*) adj5 (shortage* or supply or supplies or supplier or stock* or issue or provision* or preparedness or availability or resilien*)) and (pandemic* or epidemic* or influenza* or SARS or MERS or Ebola or Covid-19 or ((emergenc* or crisis) adj3 (national* or international* or plan* or humanitarian or public health or protocol*)) or disaster* or flood* or hurricane* or storm* or tsunami* or contingency plan* or major incident* or mass casualty incident* or nationwide)).tw,kf.</li> <li>9. 7 or 8</li> </ol> <p><b>PubMed</b></p> <p>((((blood OR platelets OR plasma OR FFP OR "red cells" OR "red blood cells" OR transfusion* OR blood donor* OR blood donat* OR platelet donor* OR platelet donat* OR blood bank*) AND (shortage* OR supply OR supplies OR supplier OR stock* OR issue OR provision* OR preparedness OR availability OR resilien*)) AND (pandemic* OR epidemic* OR influenza* OR SARS OR MERS OR Ebola OR Covid-19 OR ((emergenc* OR crisis) AND (national* OR international* OR plan OR plans OR planning OR planned OR humanitarian OR "public health" OR protocol*)) OR disaster* OR flood* OR hurricane* OR storm* OR tsunami* OR earthquake* OR contingency plan* OR major incident* OR mass casualty incident* OR nationwide)) AND (publisher[sb] OR inprocess[sb] OR pubmednotmedline[sb]))</p> |

**Embase**

1. blood bank/
2. blood donor/
3. 1 or 2
4. exp accident/
5. needs assessment/
6. exp emergency health service/
7. 4 or 5 or 6
8. 3 and 7
9. (((blood or platelets or plasma or FFP or red cells or red blood cells or transfusion or blood donor\* or blood donat\* or platelet donor\* or platelet donat\* or blood bank\*) adj5 (shortage\* or supply or supplies or supplier or stock\* or issue or provision\* or preparedness or availability or resilien\*)) and (pandemic\* or epidemic\* or influenza\* or SARS or MERS or Ebola or Covid-19 or ((emergenc\* or crisis) adj3 (national\* or international\* or plan\* or humanitarian or public health or protocol\*)) or disaster\* or flood\* or hurricane\* or storm\* or tsunami\* or contingency plan\* or major incident\* or mass casualty incident\* or nationwide)).tw,kw.
10. 8 or 9

**1c**

**Eligibility - Inclusion Criteria: any references that looks at COVID-19 in relation to any one of the following categories**

**Clinical Criteria****ABO****Anaemia**

Patients who have COVID-19 and become anaemia

Management of patients who have COVID-19 and become anaemic

**Asymptomatic**

COVID-19 patients who are asymptomatic - investigations of this; outcomes for this,

Person to person spread from asymptomatic carriers

**Coagulopathy**

Papers looking at the increased risk of bleeding / whether there is an increased risk of bleeding on COVID-19 patients

Papers looking at the risk of getting a blood clot/ whether there is an increased risk of developing a blood clot in COVID-19 patients

**Convalescent plasma**

Use of convalescent plasma for treatment of COVID-19

**Blood Donors**

Any donor related issues

Testing/screening for COVID-19 in donors

Management of blood donor sessions in the COVID-19 pandemic

**False negatives**

[Management of patients with an underlying]

**Haematological disorder**

If they develop COVID-19

In specific groups of patients, including haemoglobinopathy patients; patients with a blood cancer [e.g. leukaemia, myeloma or lymphoma] ; patients with a non-malignant haematological disorder e.g. MDS, myeloproliferative disease, aplastic anaemia

**Incubation**

Duration of time between contact with infected person and COVID-19 development.

**RNA testing**

PCR methods to detect COVID -19/ test for COVID-19

|                             |                                                                                              |
|-----------------------------|----------------------------------------------------------------------------------------------|
|                             | Papers looking at testing strategies for COVID-19 infection                                  |
| <b>Serology</b>             | Incidence of false negative results                                                          |
|                             | Antibody testing [igm/ igg]                                                                  |
|                             | Neutralising antibodies                                                                      |
|                             | Antibody testing techniques                                                                  |
| <b>Thrombocytopenia</b>     | Patients who have COVID-19 and become thrombocytopenic                                       |
|                             | Management of patients who have COVID-19 and become thrombocytopenic                         |
| <b>Transfusion</b>          | Blood shortage due to COVID-19                                                               |
|                             | Papers that look at possibility of blood borne COVID transmission                            |
|                             | Anything that mentions transfusion and COVID-19                                              |
|                             | Anything that mentions PBM and COVID-19                                                      |
| <b>Viral Shedding</b>       | Viremia [virus in the blood] in COVID-19 infected patients                                   |
|                             | Respiratory viral shedding                                                                   |
|                             | Levels of positive covid-19 virus testing in samples [blood, oral, faecal, nasal, urine etc] |
| <b>Study Type Criteria:</b> |                                                                                              |
| core outcomes set           |                                                                                              |
| systematic review           |                                                                                              |
| RCT                         |                                                                                              |
| Observational study         |                                                                                              |
| Case Report                 |                                                                                              |
| Editorial                   |                                                                                              |
| Guidance                    |                                                                                              |
| Letter                      |                                                                                              |
| Ongoing Study               |                                                                                              |
| Opinion                     |                                                                                              |
| <b>Exclusion Criteria:</b>  |                                                                                              |
| Animal Studies              |                                                                                              |
| Not COVID-19 related        |                                                                                              |

Further details on the search strategy can be obtained on consultation with the authors

**Table 2: On-going randomised trials**

| TOPIC                      | TITLE                                                                                                                                                    | TRIAL ID    | URL                                                                                                   |
|----------------------------|----------------------------------------------------------------------------------------------------------------------------------------------------------|-------------|-------------------------------------------------------------------------------------------------------|
| <b>Convalescent plasma</b> | A Phase II, Open Label, Randomized Controlled Trial to Assess the Safety and Efficacy of Convalescent Plasma to Limit COVID-19 Associated Complications. | NCT04374487 | <a href="https://ClinicalTrials.gov/show/NCT04374487">https://ClinicalTrials.gov/show/NCT04374487</a> |
|                            | Human Convalescent Plasma for High Risk Children Exposed or Infected With SARS-CoV-2                                                                     | NCT04377672 | <a href="https://ClinicalTrials.gov/show/NCT04377672">https://ClinicalTrials.gov/show/NCT04377672</a> |
|                            | Exchange Transfusion Versus Plasma From Convalescent Patients With Methylene Blue in Patients With COVID-19.                                             | NCT04376788 | <a href="https://ClinicalTrials.gov/show/NCT04376788">https://ClinicalTrials.gov/show/NCT04376788</a> |
|                            | Efficacy of Human Coronavirus-immune Convalescent Plasma for the Treatment of COVID-19 Disease in Hospitalized Children.                                 | NCT04377568 | <a href="https://ClinicalTrials.gov/show/NCT04377568">https://ClinicalTrials.gov/show/NCT04377568</a> |
|                            | Efficacy of Convalescent Plasma Therapy in the Early Care of COVID-19 Patients.                                                                          | NCT04372979 | <a href="https://ClinicalTrials.gov/show/NCT04372979">https://ClinicalTrials.gov/show/NCT04372979</a> |
|                            | Efficacy and Safety of Early COVID-19 Convalescent Plasma in Patients Admitted for COVID-19 Infection.                                                   | NCT04375098 | <a href="https://ClinicalTrials.gov/show/NCT04375098">https://ClinicalTrials.gov/show/NCT04375098</a> |
|                            | Early transfusion of Convalescent Plasma in Elderly COVID-19 Patients. to Prevent Disease Progression.                                                   | NCT04374526 | <a href="https://ClinicalTrials.gov/show/NCT04374526">https://ClinicalTrials.gov/show/NCT04374526</a> |
|                            | Convalescent Plasma to Limit SARS-CoV-2 Associated Complications.                                                                                        | NCT04373460 | <a href="https://ClinicalTrials.gov/show/NCT04373460">https://ClinicalTrials.gov/show/NCT04373460</a> |
|                            | Convalescent Plasma for Treatment of COVID-19 Patients With Pneumonia.                                                                                   | NCT04374565 | <a href="https://ClinicalTrials.gov/show/NCT04374565">https://ClinicalTrials.gov/show/NCT04374565</a> |
|                            | CONvalescent Plasma for Hospitalized Adults With COVID-19 Respiratory Illness (CONCOR-1).                                                                | NCT04348656 | <a href="https://ClinicalTrials.gov/show/NCT04348656">https://ClinicalTrials.gov/show/NCT04348656</a> |
|                            | Convalescent Plasma Therapy vs. SOC for the Treatment of COVID19 in Hospitalized Patients.                                                               | NCT04345523 | <a href="https://ClinicalTrials.gov/show/NCT04345523">https://ClinicalTrials.gov/show/NCT04345523</a> |
|                            | Convalescent Plasma vs. Placebo in Emergency Room Patients With COVID-19.                                                                                | NCT04355767 | <a href="https://ClinicalTrials.gov/show/NCT04355767">https://ClinicalTrials.gov/show/NCT04355767</a> |
|                            | Convalescent Plasma as Therapy for Covid-19 Severe SARS-CoV-2 Disease (CONCOVID Study).                                                                  | NCT04342182 | <a href="https://ClinicalTrials.gov/show/NCT04342182">https://ClinicalTrials.gov/show/NCT04342182</a> |
|                            | Efficacy of Convalescent Plasma to Treat COVID-19 Patients, a Nested Trial in the CORIMUNO-19 Cohort.                                                    | NCT04345991 | <a href="https://ClinicalTrials.gov/show/NCT04345991">https://ClinicalTrials.gov/show/NCT04345991</a> |
|                            | Efficacy and Safety Human Coronavirus Immune Plasma (HCIP) vs. Control (SARS-CoV-2 Non-immune Plasma) Among Adults Exposed to COVID-19.                  | NCT04323800 | <a href="https://ClinicalTrials.gov/show/NCT04323800">https://ClinicalTrials.gov/show/NCT04323800</a> |
|                            | Convalescent Plasma for Patients With COVID-19: A Randomized, Open Label, Parallel, Controlled Clinical Study.                                           | NCT04332835 | <a href="https://ClinicalTrials.gov/show/NCT04332835">https://ClinicalTrials.gov/show/NCT04332835</a> |
|                            | Efficacy of Convalescent Plasma Therapy in Severely Sick COVID-19 Patients.                                                                              | NCT04346446 | <a href="https://ClinicalTrials.gov/show/NCT04346446">https://ClinicalTrials.gov/show/NCT04346446</a> |
|                            | Convalescent Plasma vs. Standard Plasma for COVID-19.                                                                                                    | NCT04344535 | <a href="https://ClinicalTrials.gov/show/NCT04344535">https://ClinicalTrials.gov/show/NCT04344535</a> |

|  |                                                                                                                                                                                                                                                       |                        |                                                                                                                                                                                                       |
|--|-------------------------------------------------------------------------------------------------------------------------------------------------------------------------------------------------------------------------------------------------------|------------------------|-------------------------------------------------------------------------------------------------------------------------------------------------------------------------------------------------------|
|  | Efficacy and Safety of Novel Treatment Options for Adults With COVID-19 Pneumonia.                                                                                                                                                                    | NCT04345289            | <a href="https://ClinicalTrials.gov/show/NCT04345289">https://ClinicalTrials.gov/show/NCT04345289</a>                                                                                                 |
|  | Study Testing Convalescent Plasma vs Best Supportive Care.                                                                                                                                                                                            | NCT04333251            | <a href="https://ClinicalTrials.gov/show/NCT04333251">https://ClinicalTrials.gov/show/NCT04333251</a>                                                                                                 |
|  | Experimental study of novel coronavirus pneumonia rehabilitation plasma therapy severe novel coronavirus pneumonia (COVID-19).                                                                                                                        | ChiCTR2000030179       | <a href="https://apps.who.int/trialsearch/Trial2.aspx?TrialID=ChiCTR2000030179">https://apps.who.int/trialsearch/Trial2.aspx?TrialID=ChiCTR2000030179</a>                                             |
|  | A randomized, double-blind, parallel-controlled, trial to evaluate the efficacy and safety of anti-SARS-CoV-2 virus inactivated plasma in the treatment of severe novel coronavirus pneumonia patients (COVID-19).                                    | ChiCTR2000030010       | <a href="https://apps.who.int/trialsearch/Trial2.aspx?TrialID=ChiCTR2000030010">https://apps.who.int/trialsearch/Trial2.aspx?TrialID=ChiCTR2000030010</a>                                             |
|  | Study for using the healed novel coronavirus pneumonia (COVID-19) patients plasma in the treatment of severe critical cases.                                                                                                                          | ChiCTR2000030627       | <a href="http://www.chictr.org.cn/showproj.aspx?proj=50727">http://www.chictr.org.cn/showproj.aspx?proj=50727</a>                                                                                     |
|  | Convalescent plasma for the treatment of severe and critical novel coronavirus pneumonia (COVID-19): a prospective randomized controlled trial.                                                                                                       | ChiCTR2000029757       | <a href="https://apps.who.int/trialsearch/Trial2.aspx?TrialID=ChiCTR2000029757">https://apps.who.int/trialsearch/Trial2.aspx?TrialID=ChiCTR2000029757</a>                                             |
|  | Plasma of the convalescent in the treatment of novel coronavirus pneumonia (COVID-19) common patient: a prospective clinical trial.                                                                                                                   | ChiCTR2000030702       | <a href="http://www.chictr.org.cn/showproj.aspx?proj=50537">http://www.chictr.org.cn/showproj.aspx?proj=50537</a>                                                                                     |
|  | Cancelled by investigator:<br>A randomized, open label, controlled and single center trial to evaluate the efficacy and safety of anti-SARS-CoV-2 inactivated convalescent plasma in the treatment of novel coronavirus pneumonia (COVID-19) patient. | ChiCTR2000030381       | <a href="http://www.chictr.org.cn/showproj.aspx?proj=50290">http://www.chictr.org.cn/showproj.aspx?proj=50290</a>                                                                                     |
|  | A randomized, double-blind, parallel-controlled trial to evaluate the efficacy and safety of anti-SARS-CoV-2 virus inactivated plasma in the treatment of severe novel coronavirus pneumonia (COVID-19).                                              | ChiCTR2000030929       | <a href="http://www.chictr.org.cn/showproj.aspx?proj=50696">http://www.chictr.org.cn/showproj.aspx?proj=50696</a>                                                                                     |
|  | Clinical Study to assess positive value of blood plasma from donors having built immunity against the new corona virus (SARS-CoV-2) transfused to patients suffering from SARS-CoV-2 infection.                                                       | EUCTR2020-001310-38-DE | <a href="https://www.clinicaltrialsregister.eu/ctr-search/search?query=eudract_number:2020-001310-38">https://www.clinicaltrialsregister.eu/ctr-search/search?query=eudract_number:2020-001310-38</a> |
|  | Convalescent Plasma Trial in COVID -19 Patients.                                                                                                                                                                                                      | NCT04356534            | <a href="https://ClinicalTrials.gov/show/NCT04356534">https://ClinicalTrials.gov/show/NCT04356534</a>                                                                                                 |
|  | Comparison of The Therapeutic Effect of Convalescent Plasma and Plasma-derived Immunoglobulin-enriched solution on COVID-19 Patients                                                                                                                  | IRCT20200310046736N1   | <a href="http://en.irct.ir/trial/46424">http://en.irct.ir/trial/46424</a>                                                                                                                             |
|  | Convalescent Plasma therapy for COVID-19 Patients.                                                                                                                                                                                                    | IRCT20200325046860N1   | <a href="http://en.irct.ir/trial/46759">http://en.irct.ir/trial/46759</a>                                                                                                                             |
|  | Efficacy and safety of convalescent plasma in the treatment of COVID-19.                                                                                                                                                                              | IRCT20200404046948N1   | <a href="http://en.irct.ir/trial/46973">http://en.irct.ir/trial/46973</a>                                                                                                                             |
|  | Effect of COVID 19 survivors plasma in COVID 19 patients with ARDS                                                                                                                                                                                    | IRCT20200409047007N1   | <a href="http://en.irct.ir/trial/47058">http://en.irct.ir/trial/47058</a>                                                                                                                             |
|  | Comparison between the efficacy of intravenous immunoglobulin and convalescent plasma in COVID-19.                                                                                                                                                    | IRCT20200413047056N1   | <a href="http://en.irct.ir/trial/47212">http://en.irct.ir/trial/47212</a>                                                                                                                             |
|  | Convalescent Plasma Compared to the Best Available Therapy for the Treatment of SARS-CoV-2 Pneumonia                                                                                                                                                  | NCT04358783            | <a href="https://ClinicalTrials.gov/show/NCT04358783">https://ClinicalTrials.gov/show/NCT04358783</a>                                                                                                 |

|                                    |                                                                                                                                                                                                    |                        |                                                                                                                                                                                                       |
|------------------------------------|----------------------------------------------------------------------------------------------------------------------------------------------------------------------------------------------------|------------------------|-------------------------------------------------------------------------------------------------------------------------------------------------------------------------------------------------------|
|                                    | Plasma Therapy of COVID-19 in Critically Ill Patients                                                                                                                                              | NCT04359810            | <a href="https://ClinicalTrials.gov/show/NCT04359810">https://ClinicalTrials.gov/show/NCT04359810</a>                                                                                                 |
|                                    | Evaluation of SARS-CoV-2 (COVID-19) Antibody-containing Plasma therapy                                                                                                                             | NCT04361253            | <a href="https://ClinicalTrials.gov/show/NCT04361253">https://ClinicalTrials.gov/show/NCT04361253</a>                                                                                                 |
|                                    | Convalescent Plasma to Limit COVID-19 Complications in Hospitalized Patients                                                                                                                       | NCT04364737            | <a href="https://ClinicalTrials.gov/show/NCT04364737">https://ClinicalTrials.gov/show/NCT04364737</a>                                                                                                 |
|                                    | Clinical Trial to Evaluate the Efficacy of Treatment With Hyperimmune Plasma Obtained From Convalescent Antibodies of COVID-19 Infection                                                           | NCT04366245            | <a href="https://ClinicalTrials.gov/show/NCT04366245">https://ClinicalTrials.gov/show/NCT04366245</a>                                                                                                 |
|                                    |                                                                                                                                                                                                    |                        |                                                                                                                                                                                                       |
| <b>Immuno-globulins</b>            | Interest of early treatment with polyvalent immunoglobulins in the management of respiratory distress syndrome associated with SARS-CoV-2 infections_ COVID-19 - ICAR (IgIV in Covid-related ARds) | EUCTR2020-001570-30-FR | <a href="https://www.clinicaltrialsregister.eu/ctr-search/search?query=eudract_number:2020-001570-30">https://www.clinicaltrialsregister.eu/ctr-search/search?query=eudract_number:2020-001570-30</a> |
|                                    | IgIV in COVID-19 Related ARds (ICAR).                                                                                                                                                              | NCT04350580            | <a href="https://ClinicalTrials.gov/show/NCT04350580">https://ClinicalTrials.gov/show/NCT04350580</a>                                                                                                 |
|                                    | The Efficacy of Intravenous Immunoglobulin Therapy for Severe 2019-nCoV Infected Pneumonia.                                                                                                        | NCT04261426            | <a href="https://ClinicalTrials.gov/show/NCT04261426">https://ClinicalTrials.gov/show/NCT04261426</a>                                                                                                 |
|                                    | The efficacy of intravenous immunoglobulin (IVIg) in patients with severe COVID-19 who have not responded to standard three-drug protocol.                                                         | IRCT20200325046859N1   | <a href="http://en.irct.ir/trial/46811">http://en.irct.ir/trial/46811</a>                                                                                                                             |
|                                    | Intravenous immunoglobulin (IVIg) in the treatment of COVID-19-induced cytokine storm.                                                                                                             | IRCT20200317046797N3   | <a href="http://en.irct.ir/trial/47014">http://en.irct.ir/trial/47014</a>                                                                                                                             |
|                                    |                                                                                                                                                                                                    |                        |                                                                                                                                                                                                       |
|                                    |                                                                                                                                                                                                    |                        |                                                                                                                                                                                                       |
| <b>Blood donation</b>              | Recruit Blood Donors Via SMS During Epidemic of COVID-19.                                                                                                                                          | NCT04370886            | <a href="https://ClinicalTrials.gov/show/NCT04370886">https://ClinicalTrials.gov/show/NCT04370886</a>                                                                                                 |
|                                    |                                                                                                                                                                                                    |                        |                                                                                                                                                                                                       |
| <b>Coagulopathy and thrombosis</b> | Intermediate or Prophylactic-Dose Anticoagulation for Venous or Arterial Thromboembolism in Severe COVID-19.                                                                                       | NCT04367831            | <a href="https://clinicaltrials.gov/show/NCT04367831">https://clinicaltrials.gov/show/NCT04367831</a>                                                                                                 |
|                                    | Comparison of Two Doses of Enoxaparin for Thromboprophylaxis in Hospitalized COVID-19 Patients.                                                                                                    | NCT04366960            | <a href="https://clinicaltrials.gov/show/NCT04366960">https://clinicaltrials.gov/show/NCT04366960</a>                                                                                                 |
|                                    | Antithrombotic Therapy to Ameliorate Complications of COVID-19 ( ATTACC ).                                                                                                                         | NCT04372589            | <a href="https://ClinicalTrials.gov/show/NCT04372589">https://ClinicalTrials.gov/show/NCT04372589</a>                                                                                                 |
|                                    | Coagulopathy of COVID-19: A Pragmatic Randomized Controlled Trial of Therapeutic Anticoagulation Versus Standard Care                                                                              | NCT04362085            | <a href="https://ClinicalTrials.gov/show/NCT04362085">https://ClinicalTrials.gov/show/NCT04362085</a>                                                                                                 |
|                                    | Covid-19 Associated Coagulopathy                                                                                                                                                                   | NCT04360824            | <a href="https://ClinicalTrials.gov/show/NCT04360824">https://ClinicalTrials.gov/show/NCT04360824</a>                                                                                                 |
|                                    | A Randomized Trial of Anticoagulation Strategies in COVID-19                                                                                                                                       | NCT04359277            | <a href="https://clinicaltrials.gov/show/NCT04359277">https://clinicaltrials.gov/show/NCT04359277</a>                                                                                                 |
|                                    | Study of antithrombin as prophylaxis of acute respiratory disease in patients with COVID-19                                                                                                        | EUCTR2020-001659-42-ES | <a href="https://www.clinicaltrialsregister.eu/ctr-search/search?query=eudract_number:2020-001659-42">https://www.clinicaltrialsregister.eu/ctr-search/search?query=eudract_number:2020-001659-42</a> |
|                                    | Rhu-pGSN for Severe Covid-19 Pneumonia                                                                                                                                                             | NCT04358406            | <a href="https://ClinicalTrials.gov/show/NCT04358406">https://ClinicalTrials.gov/show/NCT04358406</a>                                                                                                 |

|                        |                                                                                                                       |                        |                                                                                                                                                                                                                                                                                                       |
|------------------------|-----------------------------------------------------------------------------------------------------------------------|------------------------|-------------------------------------------------------------------------------------------------------------------------------------------------------------------------------------------------------------------------------------------------------------------------------------------------------|
|                        |                                                                                                                       |                        | ow/NCT04358406                                                                                                                                                                                                                                                                                        |
|                        |                                                                                                                       |                        |                                                                                                                                                                                                                                                                                                       |
| <b>Haemo-therapy</b>   | Ozone Auto-hemotherapy for COVID-19 Pneumonia.                                                                        | NCT04370223            | <a href="https://clinicaltrials.gov/show/NCT04370223">https://clinicaltrials.gov/show/NCT04370223</a>                                                                                                                                                                                                 |
|                        | Effect of CytoSorb Adsorber on Hemodynamic and Immunological Parameters in Critical Ill Patients With COVID-19.       | NCT04344080            | <a href="https://ClinicalTrials.gov/show/NCT04344080">https://ClinicalTrials.gov/show/NCT04344080</a>                                                                                                                                                                                                 |
| <b>Haemoperfusion</b>  | Treatment of COVID-19-induced cytokine storm by hemoperfusion.                                                        | IRCT20200317046797N5   | <a href="http://en.irct.ir/trial/4701546797N5">http://en.irct.ir/trial/4701546797N5</a>                                                                                                                                                                                                               |
|                        | Efficacy of HA330 Hemoperfusion in Critically Ill Patients with Severe COVID-19.                                      | TCTR20200409006        | <a href="http://www.clinicaltrials.in.th/index.php?tp=regtrials&amp;menu=trialssearch&amp;smenu=fulltext&amp;task=search&amp;task2=view1&amp;id=6016">http://www.clinicaltrials.in.th/index.php?tp=regtrials&amp;menu=trialssearch&amp;smenu=fulltext&amp;task=search&amp;task2=view1&amp;id=6016</a> |
|                        |                                                                                                                       |                        |                                                                                                                                                                                                                                                                                                       |
| <b>Plasma Exchange</b> | Plasma Exchange in Patients With COVID-19 Disease and Invasive Mechanical Ventilation: a Randomized Controlled Trial. | NCT04374539            | <a href="https://ClinicalTrials.gov/show/NCT04374539">https://ClinicalTrials.gov/show/NCT04374539</a>                                                                                                                                                                                                 |
|                        | Plasma turnover in patients with COVID-19 disease and invasive mechanical ventilation.                                | EUCTR2020-001722-66-ES | <a href="https://www.clinicaltrialsregister.eu/ctr-search/search?query=eudract_number:2020-001722-66">https://www.clinicaltrialsregister.eu/ctr-search/search?query=eudract_number:2020-001722-66</a>                                                                                                 |
